# Supplementary material
Source: publisher figshare collection journal article supplement (https://gsajournals.figshare.com/articles/dataset/_/6953003)
Supplement: Supplementary file 1 [file 1]

## Sheet: Table S3
Table S3
Gene Set Enrichment Analysis (GSEA) of dot6 mutant transcriptome

## Sheet: Downregulated transcri
NAME	SIZE	ES	NES	NOM p-val	FDR q-val	FWER p-val	RANK AT MAX	LEADING EDGE
CAP2_DN	311	-0.0660194			1	0	3292	tags=64%, list=51%, signal=125%
XS(HOG1)_UP	485	-0.0705612			1	0	1388	tags=35%, list=21%, signal=42%
XS(2006)_UP	458	-0.0891338			1	0	2255	tags=52%, list=35%, signal=74%
SKO1_UP	447	-0.11998			1	0	2255	tags=57%, list=35%, signal=81%
CDC5_7H_DN	362	-0.132784	-5.84958	0	0	0	3982	tags=78%, list=62%, signal=193%
CYTOSOLIC PART_CEL	99	-0.399677	-5.51333	0	0	0	3697	tags=97%, list=57%, signal=223%
RPL3_BIND	134	-0.330822	-5.10121	0	0	0	3731	tags=92%, list=58%, signal=213%
CYTOSOLIC RIBOSOME (SENSU EUKARYOTA)_CEL	95	-0.398054	-4.99766	0	0	0	3697	tags=97%, list=57%, signal=223%
RPL25_BIND	98	-0.361809	-4.89642	0	0	0	3697	tags=94%, list=57%, signal=216%
NUCLEOLUS_CEL	111	-0.368748	-4.70357	0	0	0	1569	tags=67%, list=24%, signal=87%
UPC2_DN	263	-0.241383	-4.49009	0	0	0	1137	tags=51%, list=18%, signal=59%
RPL5_BIND	93	-0.32808	-4.46308	0	0	0	3697	tags=91%, list=57%, signal=211%
CYR1_HYPHAE_DN	289	-0.1845	-4.38131	0	0	0	2543	tags=63%, list=39%, signal=100%
RPL20A_BIND	96	-0.295813	-4.2731	0	0	0	3697	tags=89%, list=57%, signal=204%
TIF6_BIND	68	-0.39894	-4.21403	0	0	0	3677	tags=97%, list=57%, signal=223%
RPL16B_BIND	70	-0.368372	-3.98916	0	0	0	3787	tags=96%, list=59%, signal=229%
RPL17A_BIND	70	-0.362738	-3.98888	0	0	0	3697	tags=94%, list=57%, signal=218%
HAS1_BIND	99	-0.286218	-3.95942	0	0	0	3707	tags=88%, list=57%, signal=203%
RPL7B_BIND	78	-0.343291	-3.95544	0	0	0	3696	tags=92%, list=57%, signal=213%
OS(2006)_DN	209	-0.194807	-3.91252	0	0	0	1451	tags=50%, list=22%, signal=62%
RIBOSOME BIOGENESIS AND ASSEMBLY_BIO	154	-0.232	-3.84988	0	0	0	3853	tags=86%, list=60%, signal=208%
OS_DN	220	-0.189064	-3.78804	0	0	0	2617	tags=66%, list=41%, signal=107%
RPS3_BIND	92	-0.316572	-3.77027	0	0	0	4040	tags=95%, list=63%, signal=249%
RPL6A_BIND	74	-0.323437	-3.68193	0	0	0	3787	tags=92%, list=59%, signal=220%
RPS7A_BIND	100	-0.280546	-3.66254	0	0	0	3980	tags=91%, list=62%, signal=234%
CYTOSOLIC LARGE RIBOSOMAL SUBUNIT (SENSU EUKARYOTA)_CEL	49	-0.416732	-3.65526	0	0	0	3787	tags=100%, list=59%, signal=240%
IFH1_TF	103	-0.283512	-3.63012	0	0	0	3787	tags=88%, list=59%, signal=210%
RPL15A_BIND	58	-0.370096	-3.62239	0	0	0	3696	tags=95%, list=57%, signal=220%
NOC2_BIND	65	-0.354053	-3.6128	0	0	0	3670	tags=94%, list=57%, signal=215%
RLP7_BIND	62	-0.375083	-3.60328	0	0	0	3787	tags=97%, list=59%, signal=232%
FHL1_TF	107	-0.28793	-3.57101	0	0	0	3787	tags=89%, list=59%, signal=211%
RRNA METABOLIC PROCESS_BIO	99	-0.268226	-3.56433	0	0	0	1316	tags=54%, list=20%, signal=66%
RPL36A_BIND	66	-0.328753	-3.54068	0	0	0	3787	tags=92%, list=59%, signal=221%
RPL30_BIND	64	-0.320518	-3.53548	0	0	0	3697	tags=91%, list=57%, signal=210%
RPL1A_BIND	66	-0.323368	-3.52064	0	0	0	3787	tags=92%, list=59%, signal=221%
RPL10_BIND	76	-0.296067	-3.42331	0	0	0	3697	tags=88%, list=57%, signal=204%
TBF1_TF	114	-0.249828	-3.39286	0	0	0	3787	tags=85%, list=59%, signal=202%
RPS5_BIND	79	-0.29473	-3.38157	0	0	0	3697	tags=89%, list=57%, signal=205%
CYR1_YEAST_DN	296	-0.157062	-3.35464	0	0	0	4203	tags=83%, list=65%, signal=228%
RPL8B_BIND	112	-0.238559	-3.34369	0	0	0	3697	tags=84%, list=57%, signal=193%
HS_DN	227	-0.179359	-3.33783	0	0	0	1188	tags=45%, list=18%, signal=53%
RIBONUCLEOPROTEIN COMPLEX BIOGENESIS AND ASSEMBLY_BIO	196	-0.181705	-3.32492	0	0	0	3917	tags=82%, list=61%, signal=203%
YTM1_BIND	48	-0.375044	-3.32034	0	0	0	3707	tags=96%, list=57%, signal=223%
RPL6B_BIND	86	-0.281541	-3.31398	0	0	0	3787	tags=88%, list=59%, signal=211%
NOG1_BIND	88	-0.274991	-3.31332	0	0	0	3677	tags=88%, list=57%, signal=201%
RPL8A_BIND	81	-0.271989	-3.28716	0	0	0	3697	tags=86%, list=57%, signal=200%
NSA2_BIND	25	-0.509487	-3.27515	0	0	0	1234	tags=76%, list=19%, signal=94%
CYTOSOLIC SMALL RIBOSOMAL SUBUNIT (SENSU EUKARYOTA)_CEL	38	-0.401716	-3.22598	0	0	0	3696	tags=97%, list=57%, signal=226%
NIP7_BIND	52	-0.360442	-3.22161	0	0	0	3670	tags=94%, list=57%, signal=217%
RPL20B_BIND	62	-0.325338	-3.19649	0	0	0	3787	tags=92%, list=59%, signal=220%
EUKARYOTIC 48S INITIATION COMPLEX_CEL	38	-0.401716	-3.18298	0	0	0	3696	tags=97%, list=57%, signal=226%
RIBOSOMAL LARGE SUBUNIT BIOGENESIS AND ASSEMBLY_BIO	44	-0.373809	-3.16156	0	2.38186e-05	0.001	3697	tags=95%, list=57%, signal=222%
RPL16A_BIND	80	-0.288101	-3.15446	0	2.33692e-05	0.001	3697	tags=88%, list=57%, signal=202%
EUKARYOTIC 43S PREINITIATION COMPLEX_CEL	43	-0.371813	-3.12571	0	2.29364e-05	0.001	3911	tags=98%, list=61%, signal=246%
RRNA PROCESSING_BIO	96	-0.264307	-3.11797	0	2.25194e-05	0.001	1316	tags=53%, list=20%, signal=66%
HU_6H_DN	126	-0.210254	-3.06615	0	8.96675e-05	0.004	3787	tags=83%, list=59%, signal=196%
NSA1_BIND	39	-0.379145	-3.04793	0	8.80944e-05	0.004	930	tags=59%, list=14%, signal=68%
RPL11B_BIND	57	-0.305313	-3.03588	0	0.00010809	0.005	3697	tags=89%, list=57%, signal=208%
RPS1B_BIND	85	-0.257145	-3.00561	0	0.00012707	0.006	3911	tags=88%, list=61%, signal=221%
CIC1_BIND	58	-0.296051	-3.00063	0	0.000124952	0.006	930	tags=52%, list=14%, signal=60%
ERB1_BIND	64	-0.279119	-2.97025	0	0.000163701	0.008	3271	tags=83%, list=51%, signal=166%
RSA4_BIND	21	-0.522959	-2.96372	0	0.00016106	0.008	1234	tags=76%, list=19%, signal=94%
LIGASE ACTIVITY, FORMING CARBON-OXYGEN BONDS_MOL	35	-0.377841	-2.96038	0	0.000158504	0.008	3362	tags=91%, list=52%, signal=190%
BRX1_BIND	69	-0.272588	-2.95386	0	0.000156027	0.008	3787	tags=88%, list=59%, signal=212%
NUCLEOLAR PART_CEL	48	-0.336237	-2.94698	0	0.000153627	0.008	1898	tags=69%, list=29%, signal=97%
SPG5_BIND	16	-0.591869	-2.94398	0	0.000151299	0.008	1711	tags=88%, list=27%, signal=119%
EBP2_BIND	45	-0.329172	-2.934	0	0.000167257	0.009	2915	tags=82%, list=45%, signal=149%
RPL36B_BIND	67	-0.273589	-2.91404	0	0.000201255	0.011	3697	tags=87%, list=57%, signal=200%
RPF1_BIND	32	-0.400458	-2.90544	0	0.000198339	0.011	3637	tags=97%, list=56%, signal=221%
NUG1_BIND	56	-0.309391	-2.89752	0	0.000195505	0.011	979	tags=54%, list=15%, signal=63%
BIOFILMBATCH_DN	137	-0.203998	-2.89734	0	0.000192752	0.011	3696	tags=82%, list=57%, signal=187%
TRNA-CHARGING_PATH	35	-0.377841	-2.88817	0	0.000190075	0.011	3362	tags=91%, list=52%, signal=190%
NOP2_BIND	58	-0.283471	-2.88203	0	0.000205228	0.012	3677	tags=88%, list=57%, signal=202%
LIGASE ACTIVITY, FORMING AMINOACYL-TRNA AND RELATED COMPOUNDS_MOL	35	-0.377841	-2.86535	0	0.000202454	0.012	3362	tags=91%, list=52%, signal=190%
AMINOACYL-TRNA LIGASE ACTIVITY_MOL	35	-0.377841	-2.84738	0	0.00023254	0.014	3362	tags=91%, list=52%, signal=190%
SMALL NUCLEOLAR RIBONUCLEOPROTEIN COMPLEX_CEL	28	-0.420848	-2.8396	0	0.000246065	0.015	1758	tags=75%, list=27%, signal=103%
NOP7_BIND	60	-0.286317	-2.83195	0	0.000242869	0.015	1320	tags=57%, list=20%, signal=71%
RPL17B_BIND	61	-0.269269	-2.81199	0	0.000272782	0.017	3760	tags=87%, list=58%, signal=206%
RPL18B_BIND	44	-0.324621	-2.7982	0	0.00028493	0.018	4040	tags=95%, list=63%, signal=253%
PRE6_BIND	41	-0.34789	-2.7887	0	0.000281369	0.018	3463	tags=90%, list=54%, signal=193%
RPS1A_BIND	73	-0.253648	-2.77279	0	0.000277895	0.018	3697	tags=85%, list=57%, signal=196%
RPL7A_BIND	55	-0.292813	-2.75772	0	0.00030431	0.02	4040	tags=93%, list=63%, signal=246%
RIX1_BIND	28	-0.401272	-2.75433	0	0.000300643	0.02	1121	tags=64%, list=17%, signal=77%
PROTEASOME COMPLEX (SENSU EUKARYOTA)_CEL	43	-0.327444	-2.72036	0	0.000461426	0.03	3463	tags=88%, list=54%, signal=189%
RRP12_BIND	64	-0.248572	-2.71398	0	0.000486354	0.032	3696	tags=86%, list=57%, signal=199%
PROTEASOME REGULATORY PARTICLE (SENSU EUKARYOTA)_CEL	21	-0.474128	-2.69979	0	0.000539291	0.035	1993	tags=81%, list=31%, signal=117%
RPS15_BIND	37	-0.352929	-2.69972	0	0.000533092	0.035	3787	tags=95%, list=59%, signal=228%
SNORNA BINDING_MOL	29	-0.393557	-2.69467	0	0.000527034	0.035	1758	tags=72%, list=27%, signal=99%
PUF6_BIND	82	-0.225367	-2.68748	0	0.000549169	0.037	2883	tags=72%, list=45%, signal=128%
KRE33_BIND	77	-0.228659	-2.67242	0	0.000584823	0.04	3787	tags=84%, list=59%, signal=202%
AMINO ACID ACTIVATION_BIO	23	-0.43156	-2.6685	0	0.000578396	0.04	3346	tags=96%, list=52%, signal=198%
RPN11_BIND	44	-0.301251	-2.66661	0	0.000572109	0.04	3463	tags=86%, list=54%, signal=185%
RPS11A_BIND	51	-0.275283	-2.6334	0	0.000738971	0.052	3911	tags=90%, list=61%, signal=227%
RPL4B_BIND	49	-0.282866	-2.62962	0	0.00073111	0.052	3667	tags=88%, list=57%, signal=202%
NOP15_BIND	66	-0.246975	-2.60984	0	0.00077528	0.056	1268	tags=52%, list=20%, signal=63%
RPS22A_BIND	58	-0.259866	-2.6062	0	0.000792912	0.058	4388	tags=95%, list=68%, signal=293%
PUP1_BIND	32	-0.35554	-2.57307	0	0.00101511	0.074	3463	tags=91%, list=54%, signal=195%
PROCESSING OF 20S PRE-RRNA_BIO	28	-0.383559	-2.56015	0	0.00113408	0.083	1758	tags=71%, list=27%, signal=98%
MAK21_BIND	26	-0.395203	-2.54208	0.00456621	0.00132609	0.098	3262	tags=92%, list=51%, signal=186%
RPS7B_BIND	57	-0.255279	-2.53556	0	0.00136272	0.101	3787	tags=86%, list=59%, signal=206%
NOC3_BIND	41	-0.322296	-2.53195	0	0.00134923	0.101	3645	tags=90%, list=56%, signal=206%
PRE8_BIND	32	-0.353927	-2.52991	0	0.00137244	0.104	3463	tags=91%, list=54%, signal=195%
NAN1_BIND	45	-0.295333	-2.50621	0	0.00155301	0.119	1644	tags=62%, list=25%, signal=83%
PNO1_BIND	27	-0.384939	-2.50237	0	0.00160977	0.125	1104	tags=63%, list=17%, signal=76%
NOC4_BIND	42	-0.294187	-2.47171	0	0.00205963	0.159	1644	tags=62%, list=25%, signal=83%
PRE5_BIND	39	-0.3078	-2.45894	0	0.00229943	0.175	3463	tags=87%, list=54%, signal=187%
35S PRIMARY TRANSCRIPT PROCESSING_BIO	45	-0.282867	-2.45891	0	0.00227794	0.175	3367	tags=84%, list=52%, signal=175%
IPI3_BIND	17	-0.477734	-2.45862	0	0.00225685	0.175	2900	tags=94%, list=45%, signal=170%
NOP16_BIND	30	-0.337198	-2.4526	0	0.00226992	0.177	2691	tags=80%, list=42%, signal=137%
RIBOSOMAL LARGE SUBUNIT ASSEMBLY AND MAINTENANCE_BIO	30	-0.35422	-2.45194	0	0.00226057	0.178	3917	tags=97%, list=61%, signal=245%
NOG2_BIND	36	-0.331234	-2.44775	0	0.00235286	0.186	1402	tags=61%, list=22%, signal=78%
BMS1_BIND	50	-0.279944	-2.44769	0	0.00233185	0.186	1616	tags=60%, list=25%, signal=79%
RPL2A_BIND	55	-0.253415	-2.44747	0	0.00231122	0.186	3697	tags=85%, list=57%, signal=198%
RRP9_BIND	31	-0.35664	-2.4445	0	0.00234492	0.188	1644	tags=68%, list=25%, signal=90%
SCL1_BIND	38	-0.309671	-2.43707	0	0.00246658	0.198	3463	tags=87%, list=54%, signal=186%
PROTEIN CATABOLIC PROCESS_BIO	90	-0.197521	-2.4316	0	0.00256432	0.205	3463	tags=77%, list=54%, signal=163%
MRT4_BIND	108	-0.176752	-2.42447	0	0.00270092	0.216	3124	tags=71%, list=48%, signal=136%
SPB4_BIND	22	-0.406577	-2.42376	0	0.00267803	0.216	2047	tags=77%, list=32%, signal=113%
UTP9_BIND	33	-0.333288	-2.42147	0	0.00269657	0.219	1778	tags=67%, list=28%, signal=92%
RPL26B_BIND	51	-0.27101	-2.41623	0	0.00276598	0.225	3677	tags=86%, list=57%, signal=199%
RPL42B_BIND	24	-0.383782	-2.40191	0	0.00298148	0.241	3697	tags=96%, list=57%, signal=223%
DBP10_BIND	26	-0.362494	-2.40129	0	0.00295704	0.241	1164	tags=62%, list=18%, signal=75%
CDC53_UP	190	-0.145826	-2.39818	0	0.00303453	0.249	2841	tags=66%, list=44%, signal=115%
SSF1_BIND	80	-0.206377	-2.3979	0	0.00301006	0.249	2703	tags=68%, list=42%, signal=115%
RPF2_BIND	54	-0.252106	-2.38062	0	0.00337345	0.277	1436	tags=56%, list=22%, signal=71%
RPS0A_BIND	43	-0.291099	-2.37882	0	0.00339481	0.281	4049	tags=93%, list=63%, signal=248%
RPT3_BIND	60	-0.225013	-2.36702	0	0.00358514	0.3	3463	tags=80%, list=54%, signal=171%
RLP24_BIND	19	-0.422466	-2.33875	0	0.00436914	0.346	2900	tags=89%, list=45%, signal=162%
ECM29_BIND	41	-0.273889	-2.3377	0	0.00435488	0.346	4700	tags=100%, list=73%, signal=365%
RIBOSOME ASSEMBLY_BIO	41	-0.284616	-2.31968	0	0.00488582	0.379	3697	tags=88%, list=57%, signal=204%
RPS4A_BIND	87	-0.19206	-2.31573	0	0.00496333	0.384	4263	tags=87%, list=66%, signal=254%
KETOCONAZOLE_DN	151	-0.135242	-2.28409	0	0.00593813	0.442	1295	tags=40%, list=20%, signal=49%
RPL28_BIND	43	-0.266368	-2.27768	0	0.00605202	0.45	3697	tags=86%, list=57%, signal=200%
RNA MODIFICATION_BIO	32	-0.318998	-2.27506	0	0.00617516	0.46	1088	tags=56%, list=17%, signal=67%
UTP10_BIND	44	-0.268714	-2.27431	0	0.00613868	0.461	1644	tags=59%, list=25%, signal=79%
RRP1_BIND	37	-0.285323	-2.27136	0	0.00614852	0.463	909	tags=51%, list=14%, signal=59%
RPS9A_BIND	28	-0.321241	-2.26848	0	0.00617791	0.467	3849	tags=93%, list=60%, signal=229%
GENES REPRESSED BY RAPAMYCIN	327	-0.089165	-2.26762	0	0.00618841	0.468	3917	tags=74%, list=61%, signal=179%
RPL9A_BIND	50	-0.250471	-2.2593	0	0.00651319	0.489	3697	tags=84%, list=57%, signal=195%
URB1_BIND	21	-0.377933	-2.25667	0	0.00654727	0.493	4025	tags=100%, list=62%, signal=265%
TRNA AMINOACYLATION_BIO	18	-0.417828	-2.24284	0.00369004	0.00714688	0.533	3346	tags=94%, list=52%, signal=196%
RPS14B_BIND	22	-0.374965	-2.24008	0.00442478	0.00725447	0.54	3677	tags=95%, list=57%, signal=221%
MDN1_BIND	34	-0.306621	-2.22781	0	0.00775443	0.57	4025	tags=94%, list=62%, signal=249%
DIM1_BIND	26	-0.341121	-2.22639	0	0.00784862	0.577	1550	tags=65%, list=24%, signal=86%
RPN2_BIND	45	-0.254185	-2.2216	0	0.00799406	0.585	3260	tags=80%, list=50%, signal=160%
TRNA AMINOACYLATION FOR PROTEIN TRANSLATION_BIO	18	-0.417828	-2.21986	0	0.00805811	0.591	3346	tags=94%, list=52%, signal=196%
RPL27A_BIND	55	-0.217886	-2.21706	0	0.00817324	0.599	3697	tags=84%, list=57%, signal=194%
RPC31_BIND	20	-0.401279	-2.21686	0	0.00811802	0.599	2302	tags=80%, list=36%, signal=124%
RPT2_BIND	34	-0.289597	-2.21613	0	0.00810599	0.602	3463	tags=85%, list=54%, signal=183%
RPP0_BIND	79	-0.183663	-2.20959	0	0.0083336	0.613	4025	tags=84%, list=62%, signal=219%
RPS13_BIND	47	-0.240424	-2.20474	0	0.00855738	0.625	4040	tags=89%, list=63%, signal=237%
UTP21_BIND	32	-0.315064	-2.19447	0.00558659	0.00905922	0.649	1550	tags=63%, list=24%, signal=82%
PRE4_BIND	25	-0.334975	-2.17004	0.00485437	0.0104963	0.707	3359	tags=88%, list=52%, signal=183%
HYPOXIA_SETIADI_DN	22	-0.358715	-2.16578	0	0.0106647	0.714	3813	tags=95%, list=59%, signal=232%
RIBOSOMAL SUBUNIT ASSEMBLY_BIO	39	-0.277878	-2.16507	0.00584795	0.0106447	0.716	3697	tags=87%, list=57%, signal=203%
MPP10_BIND	51	-0.237665	-2.16438	0	0.0106316	0.72	4149	tags=90%, list=64%, signal=250%
NOP53_BIND	33	-0.292771	-2.1607	0.00552486	0.0108023	0.728	2008	tags=67%, list=31%, signal=96%
ENDOPEPTIDASE ACTIVITY_MOL	58	-0.222744	-2.14666	0	0.0116893	0.766	3687	tags=83%, list=57%, signal=191%
ARX1_BIND	57	-0.224415	-2.13685	0.00980392	0.012275	0.784	2960	tags=74%, list=46%, signal=135%
PEPTIDASE ACTIVITY_MOL	104	-0.146938	-2.13052	0	0.0126713	0.799	3463	tags=74%, list=54%, signal=157%
MACROMOLECULE CATABOLIC PROCESS_BIO	173	-0.127401	-2.11942	0	0.0136333	0.825	4242	tags=82%, list=66%, signal=233%
RPS24B_BIND	51	-0.222217	-2.11881	0	0.0136182	0.826	3849	tags=84%, list=60%, signal=207%
UTP8_BIND	36	-0.276788	-2.11671	0	0.0136652	0.828	1550	tags=58%, list=24%, signal=76%
RPB5_BIND	40	-0.261473	-2.11494	0.0135135	0.0137349	0.835	2838	tags=75%, list=44%, signal=133%
PURINE NUCLEOTIDE BIOSYNTHETIC PROCESS_BIO	23	-0.336239	-2.1041	0	0.0145841	0.859	3955	tags=96%, list=61%, signal=246%
SDA1_BIND	19	-0.383374	-2.09943	0	0.0149684	0.87	1465	tags=68%, list=23%, signal=88%
RSA3_BIND	24	-0.348366	-2.09917	0.00458716	0.0148938	0.87	2384	tags=75%, list=37%, signal=118%
PRE2_BIND	33	-0.285216	-2.09104	0.00564972	0.0155269	0.878	3463	tags=85%, list=54%, signal=182%
SPB1_BIND	19	-0.394103	-2.07278	0.00420168	0.0173004	0.902	3503	tags=95%, list=54%, signal=207%
DOM34_BIND	29	-0.311371	-2.06215	0.00995025	0.0183743	0.914	3689	tags=90%, list=57%, signal=208%
RPN5_BIND	33	-0.285716	-2.05962	0	0.0185564	0.915	3463	tags=85%, list=54%, signal=182%
DNA-DIRECTED RNA POLYMERASE COMPLEX_CEL	30	-0.288033	-2.0578	0	0.0186942	0.918	2777	tags=77%, list=43%, signal=134%
NUCLEAR DNA-DIRECTED RNA POLYMERASE COMPLEX_CEL	30	-0.288033	-2.04897	0	0.0195804	0.924	2777	tags=77%, list=43%, signal=134%
LIGASE ACTIVITY_MOL	108	-0.141224	-2.04695	0.0227273	0.0196976	0.926	3451	tags=72%, list=53%, signal=153%
RIX7_BIND	22	-0.33865	-2.04649	0	0.0196495	0.927	1510	tags=64%, list=23%, signal=83%
RPC37_BIND	15	-0.420586	-2.04292	0.00367647	0.0199314	0.934	1640	tags=73%, list=25%, signal=98%
RPL18A_BIND	29	-0.29468	-2.04249	0	0.0198678	0.934	4025	tags=93%, list=62%, signal=246%
LTV1_BIND	60	-0.204221	-2.02958	0.00952381	0.0212715	0.95	4733	tags=95%, list=73%, signal=353%
NMD3_BIND	24	-0.327123	-2.02495	0.00438597	0.0217039	0.953	3707	tags=92%, list=57%, signal=214%
RNA POLYMERASE COMPLEX_CEL	30	-0.288033	-2.01443	0	0.0228701	0.962	2777	tags=77%, list=43%, signal=134%
CATABOLIC PROCESS_BIO	254	-0.104627	-2.01014	0	0.0233578	0.967	4242	tags=80%, list=66%, signal=225%
RPL31A_BIND	24	-0.32783	-2.00728	0.0176211	0.0236071	0.968	4040	tags=96%, list=63%, signal=255%
NOP4_BIND	46	-0.232138	-2.00103	0.00724638	0.0244349	0.972	3675	tags=85%, list=57%, signal=195%
NOP6_BIND	26	-0.317858	-2.00037	0.00471698	0.0243837	0.972	2926	tags=81%, list=45%, signal=147%
RRP5_BIND	95	-0.155328	-1.99892	0	0.0244756	0.972	957	tags=38%, list=15%, signal=44%
RPS22B_BIND	43	-0.233502	-1.99828	0	0.0244041	0.972	3696	tags=84%, list=57%, signal=195%
RPC34_BIND	21	-0.344023	-1.99786	0	0.0243543	0.972	1640	tags=67%, list=25%, signal=89%
PRE7_BIND	25	-0.325573	-1.99561	0.00471698	0.0245374	0.972	3463	tags=88%, list=54%, signal=189%
PROTEOLYSIS INVOLVED IN CELLULAR PROTEIN CATABOLIC PROCESS_BIO	70	-0.185417	-1.99296	0.0108696	0.0247854	0.975	3463	tags=76%, list=54%, signal=162%
NOP12_BIND	117	-0.13423	-1.99251	0	0.0246683	0.975	3661	tags=75%, list=57%, signal=171%
UTP15_BIND	42	-0.238558	-1.98914	0.00724638	0.0249652	0.976	1360	tags=52%, list=21%, signal=66%
RPL13B_BIND	50	-0.226958	-1.98692	0	0.0251716	0.976	3677	tags=82%, list=57%, signal=189%
RPN8_BIND	48	-0.231098	-1.98671	0.0140845	0.0250477	0.976	3558	tags=81%, list=55%, signal=180%
CSR_DN	38	-0.251713	-1.98174	0.00662252	0.0256984	0.979	1436	tags=55%, list=22%, signal=71%
PROTEOLYSIS_BIO	93	-0.165328	-1.97708	0	0.026344	0.981	2151	tags=56%, list=33%, signal=83%
MAK21-1_SGA	39	-0.242988	-1.97206	0	0.0270423	0.985	3702	tags=85%, list=57%, signal=197%
UBIQUITIN-DEPENDENT PROTEIN CATABOLIC PROCESS_BIO	69	-0.181278	-1.96798	0	0.0275452	0.986	3463	tags=75%, list=54%, signal=161%
DNA-DIRECTED RNA POLYMERASE ACTIVITY_MOL	32	-0.271091	-1.96784	0.0106383	0.0274187	0.986	2777	tags=75%, list=43%, signal=131%
MODIFICATION-DEPENDENT PROTEIN CATABOLIC PROCESS_BIO	69	-0.181278	-1.96708	0	0.0274244	0.988	3463	tags=75%, list=54%, signal=161%
RPS8B_BIND	29	-0.274446	-1.9664	0.00471698	0.0273804	0.988	3911	tags=90%, list=61%, signal=226%
CELLULAR PROTEIN CATABOLIC PROCESS_BIO	78	-0.16918	-1.95778	0	0.0286661	0.99	3463	tags=74%, list=54%, signal=158%
CD_DN	81	-0.174351	-1.95707	0	0.0286176	0.99	4127	tags=86%, list=64%, signal=237%
RPS19B_BIND	26	-0.299904	-1.95076	0.00956938	0.0295422	0.993	3677	tags=88%, list=57%, signal=205%
RPS11B_SGA	56	-0.198347	-1.95008	0	0.0295144	0.993	3973	tags=84%, list=62%, signal=216%
RCL1_BIND	16	-0.380027	-1.93299	0.0142857	0.0325898	0.997	630	tags=56%, list=10%, signal=62%
MODIFICATION-DEPENDENT MACROMOLECULE CATABOLIC PROCESS_BIO	69	-0.181278	-1.93091	0	0.0328381	0.997	3463	tags=75%, list=54%, signal=161%
COENZYME BIOSYNTHETIC PROCESS_BIO	37	-0.239499	-1.9299	0.0167598	0.0328967	0.997	4236	tags=92%, list=66%, signal=266%
NOP1_BIND	134	-0.131581	-1.92497	0.0285714	0.0336568	0.999	3697	tags=75%, list=57%, signal=173%
DTR1_SGA	15	-0.386852	-1.92397	0.00711744	0.0336751	0.999	1974	tags=73%, list=31%, signal=105%
PURINE NUCLEOTIDE METABOLIC PROCESS_BIO	25	-0.304266	-1.9182	0.00420168	0.0346054	0.999	4190	tags=96%, list=65%, signal=272%
UTP30_BIND	35	-0.253619	-1.91145	0.00558659	0.0357768	0.999	2425	tags=69%, list=38%, signal=109%
PWP2_BIND	20	-0.334134	-1.90938	0.0045045	0.0360608	0.999	1550	tags=65%, list=24%, signal=85%
CELLULAR MACROMOLECULE CATABOLIC PROCESS_BIO	154	-0.11436	-1.908	0	0.0361629	0.999	4242	tags=81%, list=66%, signal=231%
DRS1_BIND	45	-0.220306	-1.90636	0.00704225	0.0363456	0.999	3262	tags=78%, list=51%, signal=156%
DNA-DIRECTED RNA POLYMERASE III COMPLEX_CEL	17	-0.360969	-1.89898	0.0150376	0.0374682	0.999	2302	tags=76%, list=36%, signal=119%
RPL33B_BIND	22	-0.332171	-1.89648	0.00813008	0.0377064	0.999	3661	tags=91%, list=57%, signal=209%
CELLULAR CATABOLIC PROCESS_BIO	234	-0.0879958	-1.89483	0	0.0378376	0.999	4242	tags=79%, list=66%, signal=222%
GLUCOSE CATABOLIC PROCESS_BIO	21	-0.325227	-1.8898	0.00930233	0.0387499	0.999	3629	tags=90%, list=56%, signal=206%
RIBONUCLEOTIDE BIOSYNTHETIC PROCESS_BIO	20	-0.32924	-1.88709	0.00858369	0.0391259	0.999	3955	tags=95%, list=61%, signal=244%
RRNA MODIFICATION_BIO	16	-0.365255	-1.87403	0.00395257	0.0415532	1	1644	tags=69%, list=25%, signal=92%
RPT5_BIND	47	-0.215329	-1.87389	0	0.0414147	1	3260	tags=77%, list=50%, signal=154%
PURINE RIBONUCLEOTIDE BIOSYNTHETIC PROCESS_BIO	20	-0.32924	-1.85614	0.00793651	0.0452258	1	3955	tags=95%, list=61%, signal=244%
RPL33A_BIND	21	-0.31831	-1.85188	0.0130435	0.0460271	1	3677	tags=90%, list=57%, signal=210%
GLYCOLYSIS_BIO	16	-0.378371	-1.84249	0.00706714	0.0483741	1	3588	tags=94%, list=56%, signal=211%
LOC1_BIND	26	-0.274997	-1.83869	0.00921659	0.0492279	1	930	tags=50%, list=14%, signal=58%

## Sheet: Upregulated transcript
NAME	SIZE	ES	NES	NOM p-val	FDR q-val	FWER p-val	RANK AT MAX	LEADING EDGE
CDC53_DN	232	0.477947	4.78831	0	0	0	539	tags=39%, list=8%, signal=41%
CYR1_HYPHAE_UP	357	0.375113	4.08415	0	0	0	898	tags=38%, list=14%, signal=42%
TAC1_DN	55	0.593102	4.04942	0	0	0	432	tags=44%, list=7%, signal=46%
RAS1_YEAST_UP	68	0.486351	3.55171	0	0	0	1031	tags=53%, list=16%, signal=62%
HYPOXIA_SYNNOTT_UP	243	0.335816	3.40784	0	0	0	1008	tags=33%, list=16%, signal=37%
RAS1_HYPHAE_UP	35	0.578764	3.3677	0	0	0	611	tags=51%, list=9%, signal=56%
SNF6-DOWN-30C	69	0.414565	3.06957	0	0	0	781	tags=36%, list=12%, signal=41%
STRUCTURAL CONSTITUENT OF RIBOSOME_MOL	145	0.338809	3.06505	0	0	0	3010	tags=77%, list=47%, signal=141%
MED31_UP	48	0.462891	2.98643	0	0	0	810	tags=42%, list=13%, signal=47%
G1-S CLUSTER	193	0.300174	2.92466	0	9.56289e-05	0.001	1605	tags=47%, list=25%, signal=61%
NRM1-UP	111	0.340359	2.88882	0	8.69354e-05	0.001	867	tags=32%, list=13%, signal=36%
SCH9-UP_NORMOX	58	0.415921	2.86681	0	7.96908e-05	0.001	466	tags=34%, list=7%, signal=37%
CELL CYCLE-MODULATED	492	0.251134	2.82465	0	7.35607e-05	0.001	2047	tags=48%, list=32%, signal=65%
S-G2 CLUSTER	107	0.339513	2.82261	0	6.83064e-05	0.001	3032	tags=77%, list=47%, signal=142%
CYR1_YEAST_UP	297	0.263525	2.7565	0	0.00050978	0.008	862	tags=28%, list=13%, signal=31%
WHITE_UP	105	0.326162	2.74509	0	0.000477919	0.008	1521	tags=40%, list=24%, signal=51%
OS_UP	174	0.288479	2.7409	0	0.000561693	0.01	537	tags=26%, list=8%, signal=27%
OS(2006)_UP	203	0.277376	2.73474	0	0.000530488	0.01	814	tags=27%, list=13%, signal=29%
CCR4_DN	124	0.311752	2.73416	0	0.000502568	0.01	1073	tags=33%, list=17%, signal=39%
CELLULAR BUD NECK_CEL	56	0.395411	2.73211	0	0.000477439	0.01	1612	tags=59%, list=25%, signal=78%
RIBOSOME_CEL	184	0.284425	2.72657	0	0.00050005	0.011	3010	tags=71%, list=47%, signal=130%
ORGANELLAR RIBOSOME_CEL	64	0.375516	2.70591	0	0.000736771	0.016	2653	tags=75%, list=41%, signal=126%
OS(HOG1)_UP	84	0.347056	2.70198	0	0.000787865	0.018	616	tags=29%, list=10%, signal=31%
CLA30_UP	88	0.338651	2.69988	0	0.000755037	0.018	1009	tags=36%, list=16%, signal=43%
MITOCHONDRIAL RIBOSOME_CEL	64	0.375516	2.67501	0	0.000877172	0.022	2653	tags=75%, list=41%, signal=126%
CICLOPIROX_OLAMINE_UP	50	0.399197	2.65393	0	0.00110033	0.029	63	tags=16%, list=1%, signal=16%
RHE90_UP	216	0.264287	2.64091	0	0.00130688	0.036	1388	tags=35%, list=21%, signal=43%
LARGE RIBOSOMAL SUBUNIT_CEL	86	0.340284	2.63876	0	0.00126021	0.036	3010	tags=78%, list=47%, signal=144%
GLD_UP	264	0.254356	2.63721	0	0.00121675	0.036	1363	tags=33%, list=21%, signal=41%
WHITE_2_UP	430	0.237761	2.63095	0	0.00117619	0.036	911	tags=23%, list=14%, signal=26%
SPINDLE_CEL	48	0.395735	2.62178	0	0.00132236	0.042	2342	tags=71%, list=36%, signal=110%
G2-M CLUSTER	93	0.321321	2.6081	0	0.0014597	0.048	1448	tags=43%, list=22%, signal=55%
SWI4SWI6_UP	427	0.2363	2.6071	0	0.00147316	0.05	1156	tags=29%, list=18%, signal=33%
KETOCONAZOLE_UP	198	0.268383	2.60549	0	0.00151401	0.053	591	tags=22%, list=9%, signal=24%
SCH9-DO_HPX	81	0.338889	2.58623	0	0.00168876	0.061	592	tags=26%, list=9%, signal=28%
SMALL GTPASE MEDIATED SIGNAL TRANSDUCTION_BIO	50	0.387331	2.56825	0	0.00204077	0.075	1884	tags=62%, list=29%, signal=87%
STRUCTURAL MOLECULE ACTIVITY_MOL	239	0.257149	2.56572	0	0.00201153	0.076	3256	tags=72%, list=50%, signal=140%
INTRACELLULAR SIGNALING CASCADE_BIO	80	0.328619	2.55583	0	0.00215989	0.083	1884	tags=55%, list=29%, signal=77%
SIGNAL TRANSDUCTION_BIO	130	0.289747	2.54448	0	0.00237408	0.093	1933	tags=52%, list=30%, signal=72%
MICROTUBULE CYTOSKELETON ORGANIZATION AND BIOGENESIS_BIO	49	0.387201	2.5357	0	0.00250596	0.101	2442	tags=71%, list=38%, signal=114%
RGA1_BIND	39	0.422695	2.53076	0	0.00256096	0.106	2808	tags=82%, list=43%, signal=144%
SITE OF POLARIZED GROWTH_CEL	74	0.335087	2.51194	0	0.00322683	0.135	2552	tags=68%, list=40%, signal=110%
SPINDLE POLE BODY_CEL	36	0.426337	2.50317	0	0.00361879	0.153	1883	tags=67%, list=29%, signal=94%
MICROTUBULE CYTOSKELETON_CEL	60	0.35578	2.50103	0	0.00364504	0.158	2240	tags=65%, list=35%, signal=99%
CUP2P_TFMOTIF	85	0.322132	2.49898	0	0.00366995	0.163	2339	tags=61%, list=36%, signal=95%
DFG16_UP	29	0.458889	2.48617	0	0.00413053	0.184	1254	tags=55%, list=19%, signal=68%
MICROTUBULE ORGANIZING CENTER_CEL	36	0.426337	2.48287	0	0.00420496	0.192	1883	tags=67%, list=29%, signal=94%
ZDS1_BIND	48	0.378793	2.47333	0	0.00457521	0.212	2369	tags=67%, list=37%, signal=105%
SPINDLE POLE_CEL	40	0.409895	2.46776	0	0.00461833	0.218	1883	tags=65%, list=29%, signal=91%
SSK1_BIND	31	0.449299	2.46268	0	0.00471687	0.224	524	tags=35%, list=8%, signal=38%
CYTOSKELETAL PART_CEL	144	0.269553	2.45067	0	0.00518585	0.244	2417	tags=58%, list=37%, signal=91%
CELLULAR BUD_CEL	73	0.323646	2.44209	0	0.00554449	0.262	2592	tags=67%, list=40%, signal=111%
MICROTUBULE-BASED PROCESS_BIO	60	0.347049	2.43987	0	0.00558403	0.267	2442	tags=67%, list=38%, signal=106%
STU2_BIND	16	0.580701	2.43476	0	0.00571055	0.276	1099	tags=69%, list=17%, signal=83%
LATE BIOFILM_UP	61	0.344322	2.42851	0	0.00583203	0.286	889	tags=36%, list=14%, signal=41%
CELL COMMUNICATION_BIO	141	0.264689	2.42695	0	0.00576197	0.286	1933	tags=49%, list=30%, signal=68%
ILV6_SGA	34	0.422363	2.40786	0	0.00689959	0.33	1725	tags=56%, list=27%, signal=76%
AXIAL CELLULAR BUD SITE SELECTION_BIO	18	0.528575	2.3859	0	0.00836056	0.386	2193	tags=83%, list=34%, signal=126%
RHE30_UP	176	0.247045	2.35668	0	0.0110172	0.486	869	tags=26%, list=13%, signal=29%
CDC11_BIND	18	0.534722	2.35441	0	0.0109924	0.49	2727	tags=94%, list=42%, signal=163%
CLA37_UP	155	0.257644	2.35352	0	0.0108906	0.492	1068	tags=30%, list=17%, signal=35%
RESPONSE TO TEMPERATURE STIMULUS_BIO	20	0.517244	2.34842	0	0.0113308	0.507	342	tags=40%, list=5%, signal=42%
ESTABLISHMENT OF CELL POLARITY_BIO	86	0.296051	2.33634	0	0.0123176	0.547	2193	tags=57%, list=34%, signal=85%
YML6_BIND	19	0.50235	2.33385	0	0.0123491	0.555	2653	tags=89%, list=41%, signal=151%
RIM101_NRG1_UP	163	0.252875	2.32994	0	0.012571	0.563	2694	tags=59%, list=42%, signal=99%
INCIPIENT CELLULAR BUD SITE_CEL	15	0.553401	2.31766	0	0.0137272	0.603	2193	tags=87%, list=34%, signal=131%
CWT1_STATPHASE_UP	75	0.307788	2.31544	0	0.0137645	0.61	3010	tags=73%, list=47%, signal=136%
TEC1_TF	16	0.533991	2.29932	0	0.0162148	0.682	24	tags=19%, list=0%, signal=19%
CELLULAR STRUCTURE MORPHOGENESIS_BIO	146	0.253864	2.29725	0	0.0163537	0.691	2193	tags=52%, list=34%, signal=77%
ASEXUAL REPRODUCTION_BIO	66	0.314338	2.29709	0	0.0161337	0.692	1612	tags=50%, list=25%, signal=66%
ANATOMICAL STRUCTURE MORPHOGENESIS_BIO	146	0.253864	2.29482	0	0.0162299	0.702	2193	tags=52%, list=34%, signal=77%
CDC5_7H_UP	397	0.208983	2.29385	0	0.01619	0.708	1341	tags=33%, list=21%, signal=39%
STRUCTURAL CONSTITUENT OF CYTOSKELETON_MOL	43	0.375382	2.28956	0	0.0166215	0.722	2355	tags=70%, list=36%, signal=109%
KIP2_BIND	21	0.47452	2.28818	0	0.0165905	0.726	2170	tags=76%, list=34%, signal=114%
BMDM PHAGOCYTOSIS_UP	468	0.202307	2.28522	0	0.0168525	0.731	1486	tags=33%, list=23%, signal=40%
CYTOSKELETON_CEL	156	0.246003	2.28365	0	0.0168442	0.737	2517	tags=58%, list=39%, signal=92%
CELL BUDDING_BIO	66	0.314338	2.28303	0.00111982	0.016725	0.739	1612	tags=50%, list=25%, signal=66%
MSA1_BIND	22	0.478056	2.2763	0	0.017575	0.763	1449	tags=64%, list=22%, signal=82%
ANATOMICAL STRUCTURE DEVELOPMENT_BIO	146	0.253864	2.27238	0	0.0180646	0.773	2193	tags=52%, list=34%, signal=77%
TIP41_BIND	22	0.471298	2.27041	0.001321	0.0182806	0.783	2245	tags=73%, list=35%, signal=111%
CELL MORPHOGENESIS_BIO	146	0.253864	2.26498	0	0.0189405	0.797	2193	tags=52%, list=34%, signal=77%
MRPL4_BIND	26	0.427941	2.24989	0.00249066	0.0213293	0.839	2653	tags=81%, list=41%, signal=137%
MITOCHONDRIAL LARGE RIBOSOMAL SUBUNIT_CEL	37	0.378396	2.24888	0.00118343	0.0212217	0.84	2653	tags=76%, list=41%, signal=128%
ALG1_BIND	18	0.502248	2.24328	0.00268097	0.0220607	0.855	1013	tags=56%, list=16%, signal=66%
SAK1-UP	357	0.207931	2.23556	0	0.0233849	0.878	1231	tags=31%, list=19%, signal=36%
ESTABLISHMENT AND/OR MAINTENANCE OF CELL POLARITY_BIO	89	0.277783	2.22622	0	0.025078	0.899	2322	tags=57%, list=36%, signal=88%
MICROTUBULE NUCLEATION_BIO	21	0.472227	2.22148	0.00131926	0.0258102	0.911	1883	tags=71%, list=29%, signal=101%
RESPONSE TO OSMOTIC STRESS_BIO	59	0.316352	2.21869	0	0.0260918	0.917	2592	tags=63%, list=40%, signal=104%
ORGANELLAR LARGE RIBOSOMAL SUBUNIT_CEL	37	0.378396	2.20926	0.00119474	0.0282018	0.929	2653	tags=76%, list=41%, signal=128%
BEM3_BIND	34	0.384849	2.19944	0.00245399	0.0304775	0.94	2193	tags=68%, list=34%, signal=102%
RESPONSE TO ABIOTIC STIMULUS_BIO	89	0.277135	2.19919	0.00108342	0.0301845	0.94	2753	tags=62%, list=43%, signal=106%
SEPTIN RING_CEL	15	0.522058	2.19672	0.00139276	0.0303853	0.943	2417	tags=87%, list=37%, signal=138%
ESTABLISHMENT OF CELL POLARITY (SENSU FUNGI)_BIO	83	0.28207	2.19546	0.00107759	0.0303254	0.943	2193	tags=55%, list=34%, signal=83%
RHE30_DN	267	0.213887	2.19518	0	0.0301045	0.944	3261	tags=66%, list=51%, signal=128%
REPRODUCTION OF A SINGLE-CELLED ORGANISM_BIO	125	0.248172	2.19111	0	0.0307629	0.95	2193	tags=52%, list=34%, signal=77%
EDE1_BIND	57	0.329558	2.19013	0	0.0307508	0.951	2845	tags=70%, list=44%, signal=124%
CLA37_DN	141	0.244571	2.18649	0	0.031477	0.956	497	tags=20%, list=8%, signal=21%
CHITIN- AND BETA-GLUCAN-CONTAINING CELL WALL ORGANIZATION AND BIOGENESIS_BIO	46	0.339367	2.17992	0.00114811	0.0329883	0.966	1341	tags=48%, list=21%, signal=60%
CYK3_SGA	87	0.27486	2.16528	0	0.0366959	0.973	1864	tags=47%, list=29%, signal=65%
BIOFILMBATCH_UP	207	0.22047	2.16502	0	0.0364434	0.973	485	tags=18%, list=8%, signal=19%
MRPS18_BIND	27	0.41806	2.16412	0.00126582	0.0362434	0.973	2557	tags=78%, list=40%, signal=128%
SMX3_BIND	28	0.410582	2.16349	0.00126743	0.036038	0.973	2418	tags=75%, list=37%, signal=119%
MACROMOLECULE BIOSYNTHETIC PROCESS_BIO	387	0.196722	2.15966	0	0.036782	0.974	3236	tags=64%, list=50%, signal=121%
COG2_BIND	27	0.41853	2.15415	0.00250313	0.0380904	0.976	2115	tags=70%, list=33%, signal=104%
SEPTIN CYTOSKELETON_CEL	15	0.522058	2.1518	0	0.0385092	0.981	2417	tags=87%, list=37%, signal=138%
NAM9_BIND	21	0.448715	2.14875	0	0.0389927	0.982	2557	tags=81%, list=40%, signal=134%
MITOTIC SPINDLE ORGANIZATION AND BIOGENESIS_BIO	25	0.425219	2.13701	0	0.0427429	0.989	2442	tags=76%, list=38%, signal=122%
MRP7_BIND	26	0.407699	2.13226	0	0.0439731	0.991	2808	tags=81%, list=43%, signal=142%
MRPS17_BIND	21	0.45014	2.12637	0.00132802	0.0458387	0.992	2808	tags=86%, list=43%, signal=151%
MRPL23_BIND	21	0.445833	2.12618	0.00258398	0.0455002	0.992	2599	tags=81%, list=40%, signal=135%
CAF2-1_OGT2599_UP	27	0.402461	2.1211	0.00124844	0.047077	0.994	3121	tags=85%, list=48%, signal=164%
HYPHAE FBS37 (NANTEL)_DN	74	0.28651	2.11246	0.00331858	0.0500986	0.997	1236	tags=32%, list=19%, signal=40%
